# Supplementary material for: Learning causal networks from systems biology time course data: an effective model selection procedure for the vector autoregressive process
Source: Springer Nature journal article supplement (doi:10.1186/1471-2105-8-s2-s3), 2007-05-01
Supplement: 12859_2007_1887_MOESM1_ESM.pdf [file 12859_2007_1887_MOESM1_ESM.pdf]

## Additional file 1 - annotation.pdf

This PDF file contains a multi-page table containing the annotation data (probe IDs, gene names, description) for the 92 genes displayed in the VAR network of Figure 2.

| Node | Probe ID  | Gene Name        | Description                                                                                                                                                                                                                                                                                |
|------|-----------|------------------|--------------------------------------------------------------------------------------------------------------------------------------------------------------------------------------------------------------------------------------------------------------------------------------------|
| 9    | 267432_at | At2g35020-MinT-G | putative UDP-N-acetylglucosamine pyrophosphorylase                                                                                                                                                                                                                                         |
| 11   | 267383_at | AT2G44360-TAIR-G | unknown protein; expressed protein                                                                                                                                                                                                                                                         |
| 13   | 267341_at | AT2G44200-TAIR-G | unknown protein; expressed protein                                                                                                                                                                                                                                                         |
| 16   | 267123_at | AT2G23560-TAIR-G | catalytic/ hydrolase; hydrolase, alpha/beta fold family protein, similar to ethylene-induced esterase ( <i>Citrus sinensis</i> ) GI:14279437, polyneuridine aldehyde esterase ( <i>Rauvolfia serpentina</i> ) GI:6651393; contains Pfam profile PF00561: hydrolase, alpha/beta fold family |
| 20   | 266995_at | At2g34500-MinT-G | putative cytochrome P450                                                                                                                                                                                                                                                                   |
| 26   | 266897_at | AT2G45820-TAIR-G | DNA binding; DNA-binding protein, putative, identical to DNA-binding protein gi—601843—gb—AAA57124 ( <i>Arabidopsis thaliana</i> ); contains Pfam domain, PF03766: Remorin, N-terminal region; contains Pfam domain, PF03763: Remorin, C-terminal region                                   |
| 44   | 266314_at | AT2G27040-TAIR-G | AGO4 (ARGONAUTE 4); PAZ domain-containing protein / piwi domain-containing protein, similar to SP—Q9QZ81 Eukaryotic translation initiation factor 2C 2 <i>Rattus norvegicus</i> ; contains Pfam profiles PF02171: Piwi domain, PF02170: PAZ domain                                         |
| 47   | 266247_at | AT2G27660-TAIR-G | unknown protein; DC1 domain-containing protein, contains Pfam profile PF03107: DC1 domain                                                                                                                                                                                                  |
| 61   | 265721_at | AT2G40090-TAIR-G | ATATH9; member of ATH subfamily                                                                                                                                                                                                                                                            |

|     |           |                  |                                                                                                                                                                                                                                                                                                                       |
|-----|-----------|------------------|-----------------------------------------------------------------------------------------------------------------------------------------------------------------------------------------------------------------------------------------------------------------------------------------------------------------------|
| 62  | 265695_at | AT2G24490-TAIR-G | nucleic acid binding; replication protein, putative, similar to replication protein A 30kDa ( <i>Oryza sativa</i> (japonica cultivar-group)) GI:13516746; contains InterPro entry IPR004365: OB-fold nucleic acid binding domain                                                                                      |
| 63  | 265674_at | AT2G32190-TAIR-G | unknown protein; expressed protein                                                                                                                                                                                                                                                                                    |
| 78  | 264986_at | At1g27130-MinT-G | glutathione transferase, putative                                                                                                                                                                                                                                                                                     |
| 81  | 264924_at | AT1G60620-TAIR-G | ATRPAC43; DNA binding / DNA-directed RNA polymerase; DNA-directed RNA polymerase, putative, identical to RNA polymerase subunit ( <i>Arabidopsis thaliana</i> ) GI:514324; contains Pfam profile PF01000: RNA polymerase Rpb3/RpoA insert domain                                                                      |
| 85  | 264837_at | AT1G03600-TAIR-G | unknown protein; photosystem II family protein, similar to SP:P74367 <i>Synechocystis</i> sp.; similar to ESTs emb—Z27038, gb—AA451546, emb—Z29876, gb—T45359 and gb—R90316                                                                                                                                           |
| 86  | 264832_at | AT1G03660-TAIR-G | unknown protein; expressed protein, contains 2 predicted transmembrane domains; expression supported by MPSS                                                                                                                                                                                                          |
| 108 | 264179_at | AT1G02180-TAIR-G | unknown protein; ferredoxin-related, similar to Ferredoxin. (SP:O78510) ( <i>Cryptomonas phi</i> ) <i>Guillardia theta</i>                                                                                                                                                                                            |
| 109 | 264131_at | At1g79150-MinT-G | hypothetical protein                                                                                                                                                                                                                                                                                                  |
| 111 | 264063_at | At2g27910-MinT-G | unknown protein                                                                                                                                                                                                                                                                                                       |
| 114 | 264038_at | At2g03690-MinT-G | putative ubiquinone biosynthesis protein                                                                                                                                                                                                                                                                              |
| 115 | 264004_at | At2g22425-MinT-G | unknown protein                                                                                                                                                                                                                                                                                                       |
| 120 | 263852_at | At2g04450-MinT-G | putative mutT domain protein                                                                                                                                                                                                                                                                                          |
| 135 | 263489_at | At2g31830-MinT-G | putative inositol polyphosphate 5'-phosphatase                                                                                                                                                                                                                                                                        |
| 152 | 263193_at | AT1G36050-STG    | unknown protein                                                                                                                                                                                                                                                                                                       |
| 155 | 263047_at | AT2G17630-TAIR-G | phosphoserine transaminase/ transaminase; phosphoserine aminotransferase, putative, similar to Phosphoserine aminotransferase, chloroplast precursor (PSAT) (SP:Q96255) ( <i>Arabidopsis thaliana</i> ); contains TIGRFAM TIGR01364: phosphoserine aminotransferase; contains Pfam PF00266: aminotransferase, class V |

|     |             |                  |                                                                                                                                                                                                                                                                                                                          |
|-----|-------------|------------------|--------------------------------------------------------------------------------------------------------------------------------------------------------------------------------------------------------------------------------------------------------------------------------------------------------------------------|
| 181 | 262501_at   | At1g21690-MinT-G | putative replication factor C subunit                                                                                                                                                                                                                                                                                    |
| 198 | 262134_at   | AT1G77990-TAIR-G | AST56; sulfate transporter; cDNA encoding a sulfate transporter.                                                                                                                                                                                                                                                         |
| 211 | 261810_at   | At1g08130-MinT-G | DNA ligase                                                                                                                                                                                                                                                                                                               |
| 219 | 261696_at   | AT1G08470-TAIR-G | strictosidine synthase; strictosidine synthase family protein, similar to strictosidine synthase ( <i>Rauvolfia serpentina</i> )(SP—P15324)                                                                                                                                                                              |
| 230 | 261484_at   | AT1G14400-TAIR-G | UBC1 (UBIQUITIN CARRIER PROTEIN 1); ubiquitin conjugating enzyme/ ubiquitin-like activating enzyme; ubiquitin carrier protein (UBC1) mRNA, complete cds                                                                                                                                                                  |
| 233 | 261440_at   | AT1G28510-TAIR-G | unknown protein; expressed protein                                                                                                                                                                                                                                                                                       |
| 234 | 261425_at   | At1g18880-MinT-G | unknown protein                                                                                                                                                                                                                                                                                                          |
| 272 | 260143_at   | AT1G71880-TAIR-G | SUC1; carbohydrate transporter/ sucrose:hydrogen symporter/ sugar porter; member of Sucrose-proton symporter family                                                                                                                                                                                                      |
| 276 | 260099_at   | AT1G73180-TAIR-G | unknown protein; eukaryotic translation initiation factor-related, similar to eukaryotic translation initiation factor 2A (GI:21956484) ( <i>Homo sapiens</i> ); similar to Eukaryotic translation initiation factor 3 subunit 9 (eIF-3 eta) (eIF3 p116) (eIF3 p110) (eIF3b) (Swiss-Prot:P55884) ( <i>Homo sapiens</i> ) |
| 289 | 259875_s_at | No gene          |                                                                                                                                                                                                                                                                                                                          |
| 299 | 259645_at   | AT1G69010-TAIR-G | DNA binding / transcription factor; basic helix-loop-helix (bHLH) family protein, contains Pfam profile: PF00010 helix-loop-helix DNA-binding domain                                                                                                                                                                     |
| 302 | 259488_at   | AT1G15780-TAIR-G | unknown protein; expressed protein                                                                                                                                                                                                                                                                                       |
| 304 | 259406_at   | At1g17690-MinT-G | unknown protein                                                                                                                                                                                                                                                                                                          |
| 320 | 259111_at   | At3g05520-MinT-G | alpha subunit of F-actin capping protein                                                                                                                                                                                                                                                                                 |
| 324 | 259069_at   | At3g11710-MinT-G | lysyl-tRNA synthetase                                                                                                                                                                                                                                                                                                    |
| 328 | 258871_at   | AT3G03060-TAIR-G | ATP binding / ATPase/ nucleoside-triphosphatase/ nucleotide binding; AAA-type ATPase family protein, contains a ATP/GTP-binding site motif A (P-loop), PROSITE:PS00017                                                                                                                                                   |

|     |           |                  |                                                                                                                                                                                                                                                                                              |
|-----|-----------|------------------|----------------------------------------------------------------------------------------------------------------------------------------------------------------------------------------------------------------------------------------------------------------------------------------------|
| 329 | 258781_at | AT3G11740-TAIR-G | unknown protein; expressed protein, similar to expressed protein [Arabidopsis thaliana] (TAIR:At5g01750.2); similar to hypothetical protein [Oryza sativa (japonica cultivar-group)] (GB:XP_470102.1); contains InterPro domain Protein of unknown function DUF567 (InterPro:IPR007612)      |
| 331 | 258764_at | AT3G10720-TAIR-G | enzyme inhibitor/ pectinesterase; pectinesterase, putative, contains similarity to pectinesterase from Vitis vinifera GI:15081598, Prunus persica SP—Q43062; contains Pfam profile PF01095 pectinesterase                                                                                    |
| 341 | 258432_at | At3g16570-MinT-G | unknown protein                                                                                                                                                                                                                                                                              |
| 395 | 256626_at | AT3G20015-TAIR-G | pepsin A; similar to aspartyl protease family protein [Arabidopsis thaliana] (TAIR:At3g18490.1); similar to putative aspartic proteinase nepenthesin I [Oryza sativa (japonica cultivar-group)] (GB:NP_909181.1); contains InterPro domain Aspartic protease A1, pepsin (InterPro:IPR001461) |
| 414 | 256169_at | At1g51800-MinT-G | unknown protein                                                                                                                                                                                                                                                                              |
| 422 | 255844_at | AT2G33580-TAIR-G | kinase; protein kinase family protein / peptidoglycan-binding LysM domain-containing protein, protein kinase (Arabidopsis thaliana) GI:2852449; contains Pfam profiles PF01476: LysM domain, PF00069: Protein kinase domain                                                                  |
| 429 | 255645_at | AT4G00880-TAIR-G | unknown protein; auxin-responsive family protein, similar to small auxin up RNA (GI:546362) Arabidopsis thaliana                                                                                                                                                                             |
| 452 | 254785_at | At4g12730-MinT-G | fasciclin-like arabinogalactan protein FLA2                                                                                                                                                                                                                                                  |
| 464 | 254515_at | At4g20270-MinT-G | CLV1 receptor kinase like protein                                                                                                                                                                                                                                                            |
| 476 | 254239_at | AT4G23400-TAIR-G | PIP1;5/PIP1D; water channel; major intrinsic family protein / MIP family protein, contains Pfam profile: MIP PF00230                                                                                                                                                                         |

|     |           |                  |                                                                                                                                                                                                                                                                                                                                                                           |
|-----|-----------|------------------|---------------------------------------------------------------------------------------------------------------------------------------------------------------------------------------------------------------------------------------------------------------------------------------------------------------------------------------------------------------------------|
| 477 | 254233_at | AT4G23800-TAIR-G | transcription factor; high mobility group (HMG1/2) family protein, similar to HMG2B (Homo sapiens) GI:32335; contains Pfam profile PF00505: HMG (high mobility group) box                                                                                                                                                                                                 |
| 479 | 254211_at | AT4G23570-TAIR-G | SGT1A; Closely related to SGT1B, may function in SCF(TIR1) mediated protein degradation                                                                                                                                                                                                                                                                                   |
| 480 | 254162_at | At4g24440-MinT-G | transcription factor IIA small subunit                                                                                                                                                                                                                                                                                                                                    |
| 489 | 253927_at | AT4G26710-TAIR-G | hydrogen-transporting ATP synthase, rotational mechanism / hydrogen-transporting ATPase, rotational mechanism; ATP synthase subunit H family protein, contains similarity to Swiss-Prot:O15342 Vacuolar ATP synthase subunit H (V-ATPase H subunit) (Vacuolar proton pump H subunit) (V-ATPase M9.2 subunit) (V-ATPase 9.2 kDa membrane accessory protein) (Homo sapiens) |
| 496 | 253708_at | At4g29210-MinT-G | gamma-glutamyltransferase-like protein                                                                                                                                                                                                                                                                                                                                    |
| 508 | 253523_at | AT4G31340-TAIR-G | unknown protein; similar to DNA repair ATPase-related [Arabidopsis thaliana] (TAIR:At2g24420.2); similar to DNA repair ATPase-related [Arabidopsis thaliana] (TAIR:At2g24420.1); similar to unknown [Oryza sativa (japonica cultivar-group)] (GB:AAO72581.1)                                                                                                              |
| 519 | 253202_at | AT4G34555-TAIR-G | structural constituent of ribosome; 40S ribosomal protein S25, putative                                                                                                                                                                                                                                                                                                   |
| 539 | 252427_at | AT3G47640-TAIR-G | DNA binding / transcription factor; basic helix-loop-helix (bHLH) family protein, contains Pfam profile: PF00010 helix-loop-helix DNA-binding domain                                                                                                                                                                                                                      |
| 540 | 252420_at | At3g47530-MinT-G | putative protein                                                                                                                                                                                                                                                                                                                                                          |
| 545 | 252098_at | At3g51330-MinT-G | predicted GPI-anchored protein                                                                                                                                                                                                                                                                                                                                            |
| 558 | 251834_at | AT3G55170-TAIR-G | structural constituent of ribosome; 60S ribosomal protein L35 (RPL35C), various ribosomal L35 proteins                                                                                                                                                                                                                                                                    |
| 560 | 251786_at | At3g55270-MinT-G | MAP kinase phosphatase (MKP1)                                                                                                                                                                                                                                                                                                                                             |

|     |           |                  |                                                                                                                                                                                                                                                                                                                                                                                                              |
|-----|-----------|------------------|--------------------------------------------------------------------------------------------------------------------------------------------------------------------------------------------------------------------------------------------------------------------------------------------------------------------------------------------------------------------------------------------------------------|
| 562 | 251768_at | AT3G55940-TAIR-G | phosphoinositide phospholipase C/<br>phospholipase C; phosphoinositide-<br>specific phospholipase C, putative,<br>similar to phosphoinositide specific<br>phospholipase C GI:857374 from<br>( <i>Arabidopsis thaliana</i> )                                                                                                                                                                                  |
| 570 | 251598_at | At3g57600-MinT-G | AP2 transcription factor - like protein                                                                                                                                                                                                                                                                                                                                                                      |
| 573 | 251483_at | At3g59650-MinT-G | unknown protein                                                                                                                                                                                                                                                                                                                                                                                              |
| 583 | 251227_at | At3g62700-MinT-G | ABC transporter-like protein                                                                                                                                                                                                                                                                                                                                                                                 |
| 585 | 251123_at | AT5G01030-TAIR-G | unknown protein; expressed protein                                                                                                                                                                                                                                                                                                                                                                           |
| 598 | 250661_at | At5g07030-MinT-G | nucleoid DNA-binding-like protein                                                                                                                                                                                                                                                                                                                                                                            |
| 603 | 250520_at | At5g08470-MinT-G | putative protein                                                                                                                                                                                                                                                                                                                                                                                             |
| 606 | 250433_at | AT5G10400-TAIR-G | DNA binding; histone H3, identi-<br>cal to several histone H3 proteins,<br>including <i>Zea mays</i> SP—P05203,<br><i>Medicago sativa</i> GI:166384, <i>En-<br/>cephalartos altensteinii</i> SP—P08903,<br><i>Pisum sativum</i> SP—P02300; contains<br>Pfam profile PF00125 Core histone<br>H2A/H2B/H3/H4                                                                                                    |
| 622 | 249997_at | AT5G18620-TAIR-G | ATP binding / ATP-dependent heli-<br>case/ DNA binding / DNA-dependent<br>ATPase/ helicase/ nucleic acid bind-<br>ing; DNA-dependent ATPase, putative,<br>similar to DNA-dependent ATPase<br>SNF2H ( <i>Mus musculus</i> ) GI:14028669;<br>contains Pfam profiles PF00271: He-<br>licase conserved C-terminal domain,<br>PF00176: SNF2 family N-terminal<br>domain, PF00249: Myb-like DNA-<br>binding domain |
| 627 | 249817_at | AT5G23820-TAIR-G | unknown protein; MD-2-related lipid<br>recognition domain-containing protein<br>/ ML domain-containing protein, con-<br>tains Pfam profile PF02221: ML do-<br>main                                                                                                                                                                                                                                           |
| 629 | 249777_at | AT5G24210-TAIR-G | triacylglycerol lipase; lipase class 3<br>family protein, contains Pfam profile<br>PF01764: Lipase                                                                                                                                                                                                                                                                                                           |
| 636 | 249569_at | At5g38070-MinT-G | putative protein                                                                                                                                                                                                                                                                                                                                                                                             |
| 648 | 249315_at | At5g41190-MinT-G | unknown protein                                                                                                                                                                                                                                                                                                                                                                                              |
| 651 | 249211_at | At5g42680-MinT-G | putative protein                                                                                                                                                                                                                                                                                                                                                                                             |
| 679 | 248295_at | At5g53070-MinT-G | unknown protein (At5g53070)                                                                                                                                                                                                                                                                                                                                                                                  |

|     |             |                  |                                                                                                                                                                                                                                                                                                                                                                            |
|-----|-------------|------------------|----------------------------------------------------------------------------------------------------------------------------------------------------------------------------------------------------------------------------------------------------------------------------------------------------------------------------------------------------------------------------|
| 680 | 248248_at   | AT5G53120-TAIR-G | SPDS3 (SPERMIDINE SYNTHASE 3); encodes a novel spermine synthase and is a paralog of previously characterized spermidine synthases, SPDS1 and SPDS2. SPDS3 forms heterodimers with SDPS2, which in turn forms heterodimers with SDPS1 in vivo. The gene does not complement speDelta3 deficiency of spermidine synthase in yeast but DOES complement speDelta4 deficiency. |
| 704 | 247791_at   | AT5G58710-TAIR-G | ROC7; peptidyl-prolyl cis-trans isomerase; cyclophilin (ROC7) mRNA, complete cds                                                                                                                                                                                                                                                                                           |
| 714 | 247554_at   | AT5G61010-TAIR-G | protein binding; similar to exocyst subunit EXO70 family protein [Arabidopsis thaliana] (TAIR:At3g29400.1); similar to putative leucine zipper-containing protein [Oryza sativa (japonica cultivar-group)] (GB:XP_465879.1); contains InterPro domain Exo70 exocyst complex subunit (InterPro:IPR004140)                                                                   |
| 726 | 247097_at   | AT5G66460-TAIR-G | hydrolase, hydrolyzing O-glycosyl compounds; (1-4)-beta-mannan endohydrolase, putative, similar to (1-4)-beta-mannan endohydrolase (Coffea arabica) GI:10178872; contains Pfam profile PF00150: Cellulase (glycosyl hydrolase family 5)                                                                                                                                    |
| 729 | 247055_at   | At5g66740-MinT-G | putative protein                                                                                                                                                                                                                                                                                                                                                           |
| 736 | 246976_s_at | At5g24810-MinT-G | unknown protein                                                                                                                                                                                                                                                                                                                                                            |
| 740 | 246837_at   | At5g26670-MinT-G | pectin acetylesterase precursor - like protein                                                                                                                                                                                                                                                                                                                             |
| 757 | 246421_at   | At5g16880-MinT-G | TOM (target of myb1) -like protein                                                                                                                                                                                                                                                                                                                                         |
| 767 | 246043_at   | AT5G19380-TAIR-G | unknown protein; expressed protein                                                                                                                                                                                                                                                                                                                                         |
| 779 | 245619_at   | AT4G13990-TAIR-G | catalytic; exostosin family protein, contains Pfam profile: PF03016 exostosin family                                                                                                                                                                                                                                                                                       |
| 781 | 245435_at   | At4g17130-MinT-G | hypothetical protein                                                                                                                                                                                                                                                                                                                                                       |

|     |             |                  |                                                                                                                                                                                                                                                                                                                               |
|-----|-------------|------------------|-------------------------------------------------------------------------------------------------------------------------------------------------------------------------------------------------------------------------------------------------------------------------------------------------------------------------------|
| 783 | 245404_at   | AT4G17610-TAIR-G | RNA binding / RNA methyltransferase; tRNA/rRNA methyltransferase (SpoU) family protein, similar to TAR RNA loop binding protein (Homo sapiens) GI:1184692; contains Pfam profile PF00588: SpoU rRNA Methylase (RNA methyltransferase, TrmH) family                                                                            |
| 786 | 245347_at   | AT4G14890-TAIR-G | electron carrier/ electron transporter/ iron ion binding; ferredoxin family protein, similar to SP—P00252 Ferredoxin I from Nostoc muscorum, SP—P00248 Ferredoxin from Mastigocladus laminosus, SP—P00244 Ferredoxin I from Aphanizomenon flos-aquae; contains Pfam profile PF00111 2Fe-2S iron-sulfur cluster binding domain |
| 793 | 245218_s_at | No gene          |                                                                                                                                                                                                                                                                                                                               |
| 800 | 244996_at   | ATCG00160-TAIR-G | RPS2 (RIBOSOMAL PROTEIN S2); Chloroplast ribosomal protein S2                                                                                                                                                                                                                                                                 |

---
